# Supplementary material for: Who Counts Where? COVID-19 Surveillance in Federal Countries
Source: Oxford University Press journal article supplement (doi:10.1215/03616878-9349114), 2021-05-21
Supplement: jhp466_03roccoonlineappendix.pdf [file jhp466_03roccoonlineappendix.pdf]

## Online Appendix

**Table A1** Description of Independent Variables and Control Variables

| Measure                         | Data source               | Definition                                                                                                                                                                                                        |
|---------------------------------|---------------------------|-------------------------------------------------------------------------------------------------------------------------------------------------------------------------------------------------------------------|
| <b>State capacity</b>           |                           |                                                                                                                                                                                                                   |
| Government effectiveness        | World Bank Indicators     | Public perceptions of public service quality                                                                                                                                                                      |
| Public health expenditures      | World Health Organization | Public health expenditures as a percent of GDP, 2014                                                                                                                                                              |
| Pandemic preparedness           | NTI (2019)                | Country score on pandemic preparedness index, which measures ability to prevent, detect and respond rapidly to disease outbreaks.                                                                                 |
| Health capacity                 | NTI (2019)                | Country score on index of health care capacity in clinics, hospitals, and community care centers, which incorporates measures of personnel and facilities per capita.                                             |
| Laboratory system capacity      | NTI (2019)                | Country score on index of laboratory systems capacity, which incorporates measures of national capacity to conduct laboratory analysis of priority diseases.                                                      |
| Real-time surveillance capacity | NTI (2019)                | Country score on index of national surveillance systems, which incorporates measures of indicator and event-based surveillance/reporting systems, interoperable electronic health records, and data transparency. |
| <b>Decentralization</b>         |                           |                                                                                                                                                                                                                   |
| Fiscal decentralization         | Ivanyna and Shah (2014)   | The extent to which subnational governments have autonomy over expenditures, taxation, and are empowered to borrow money.                                                                                         |
| Administrative decentralization | Ivanyna and Shah (2014)   | The extent to which subnational governments have autonomy over policies related to employee hiring and firing, and the share of local government employment as a share of total government employment.            |

|                                     |                                         |                                                                                                                              |
|-------------------------------------|-----------------------------------------|------------------------------------------------------------------------------------------------------------------------------|
| Political decentralization          | Ivanyna and Shah (2014)                 | The extent to which subnational governments have elected legislatures and executives, as well as direct democracy provisions |
| <b>Democratic Institutions</b>      |                                         |                                                                                                                              |
| Liberal democracy                   | Varieties of Democracy Institute (2019) | Extent to which the ideal of a liberal democracy is achieved                                                                 |
| Free and fair subnational elections | Varieties of Democracy Institute (2019) | Extent to which subnational elections are free and fair                                                                      |
| Media independence                  | Varieties of Democracy Institute (2019) | Extent to which journalists are independent of influence through payments for altering news coverage                         |
| <b>Control</b>                      |                                         |                                                                                                                              |
| Per capita Gross Domestic Product   | World Bank Indicators                   | Logged measure of per capita Gross Domestic Product                                                                          |

**Table A2** Estimates and p-values: Subnational Data Quality Index

|                                         | <b>Without<br/>Control</b> |       | <b>With<br/>Control</b> |       |
|-----------------------------------------|----------------------------|-------|-------------------------|-------|
|                                         | Coefficient                | P     | Coefficient             | P     |
| <b>State capacity</b>                   |                            |       |                         |       |
| Government effectiveness                | 0.17                       | 0.001 | 0.11                    | 0.41  |
| Public health expenditures              | 0.19                       | 0.000 | 0.25                    | 0.000 |
| Pandemic preparedness                   | 0.10                       | 0.09  | 0.03                    | 0.57  |
| Real-time surveillance and<br>reporting | 0.18                       | 0.000 | 0.14                    | 0.000 |
| Health capacity                         | 0.14                       | 0.02  | 0.07                    | 0.17  |
| Laboratory systems                      | 0.16                       | 0.000 | 0.12                    | 0.004 |
| <b>Decentralization</b>                 |                            |       |                         |       |
| Fiscal decentralization                 | 0.20                       | 0.000 | 0.21                    | 0.000 |
| Administrative decentralization         | 0.16                       | 0.002 | 0.10                    | 0.27  |
| Political decentralization              | 0.10                       | 0.04  | 0.03                    | 0.69  |
| <b>Democratic Institutions</b>          |                            |       |                         |       |
| Liberal democracy                       | 0.20                       | 0.000 | 0.24                    | 0.002 |
| Free and fair subnational<br>elections  | 0.19                       | 0.000 | 0.14                    | 0.003 |
| Media independence                      | 0.20                       | 0.000 | 0.20                    | 0.002 |

**Table A3** Estimates and p-values: Mortality Data Index

|                                         | <b>Without<br/>Control</b> |       | <b>With<br/>Control</b> |       |
|-----------------------------------------|----------------------------|-------|-------------------------|-------|
|                                         | Coefficient                | P     | Coefficient             | P     |
| <b>State capacity</b>                   |                            |       |                         |       |
| Government effectiveness                | 0.16                       | 0.001 | 0.20                    | 0.06  |
| Public health expenditures              | 0.14                       | 0.002 | 0.15                    | 0.08  |
| Pandemic preparedness                   | 0.11                       | 0.07  | 0.07                    | 0.32  |
| Real-time surveillance and<br>reporting | 0.14                       | 0.000 | 0.11                    | 0.002 |
| Health capacity                         | 0.10                       | 0.10  | 0.04                    | 0.46  |
| Laboratory systems                      | 0.11                       | 0.04  | 0.08                    | 0.13  |
| <b>Decentralization</b>                 |                            |       |                         |       |
| Fiscal decentralization                 | 0.16                       | 0.000 | 0.16                    | 0.09  |
| Administrative decentralization         | 0.13                       | 0.01  | 0.08                    | 0.38  |
| Political decentralization              | 0.07                       | 0.19  | −0.00                   | 0.99  |
| <b>Democratic Institutions</b>          |                            |       |                         |       |
| Liberal democracy                       | 0.15                       | 0.000 | 0.14                    | 0.11  |
| Free and fair subnational<br>elections  | 0.15                       | 0.000 | 0.12                    | 0.001 |
| Media independence                      | 0.13                       | 0.02  | 0.08                    | 0.47  |

**Table A4** Estimates and p-values: Hospital Data Index

|                                      | <b>Without Control</b> |       | <b>With Control</b> |      |
|--------------------------------------|------------------------|-------|---------------------|------|
|                                      | Coefficient            | P     | Coefficient         | P    |
| <b>State capacity</b>                |                        |       |                     |      |
| Government effectiveness             | 0.11                   | 0.05  | 0.25                | 0.09 |
| Public health expenditures           | 0.09                   | 0.07  | 0.16                | 0.13 |
| Pandemic preparedness                | 0.09                   | 0.08  | 0.07                | 0.13 |
| Real-time surveillance and reporting | 0.14                   | 0.003 | 0.13                | 0.01 |
| Health capacity                      | 0.05                   | 0.27  | 0.02                | 0.71 |
| Laboratory systems                   | 0.12                   | 0.003 | 0.10                | 0.01 |
| <b>Decentralization</b>              |                        |       |                     |      |
| Fiscal decentralization              | 0.14                   | 0.01  | 0.25                | 0.03 |
| Administrative decentralization      | 0.08                   | 0.21  | 0.07                | 0.47 |
| Political decentralization           | -0.004                 | 0.94  | -0.06               | 0.43 |
| <b>Democratic Institutions</b>       |                        |       |                     |      |
| Liberal democracy                    | 0.14                   | 0.01  | 0.27                | 0.01 |
| Free and fair subnational elections  | 0.12                   | 0.005 | 0.13                | 0.02 |
| Media independence                   | 0.12                   | 0.03  | 0.19                | 0.08 |

**Table A5** Estimates and p-values: Testing Data Index

|                                      | <b>Without<br/>Control</b> |       | <b>With<br/>Control</b> |       |
|--------------------------------------|----------------------------|-------|-------------------------|-------|
|                                      | Coefficient                | P     | Coefficient             | P     |
| <b>State capacity</b>                |                            |       |                         |       |
| Government effectiveness             | 0.19                       | 0.02  | 0.17                    | 0.49  |
| Public health expenditures           | 0.25                       | 0.000 | 0.45                    | 0.001 |
| Pandemic preparedness                | 0.09                       | 0.39  | −0.00                   | 0.99  |
| Real-time surveillance and reporting | 0.26                       | 0.000 | 0.23                    | 0.001 |
| Health capacity                      | 0.22                       | 0.002 | 0.18                    | 0.03  |
| Laboratory systems                   | 0.25                       | 0.000 | 0.21                    | 0.006 |
| <b>Decentralization</b>              |                            |       |                         |       |
| Fiscal decentralization              | 0.22                       | 0.009 | 0.22                    | 0.07  |
| Administrative decentralization      | 0.14                       | 0.15  | 0.02                    | 0.90  |
| Political decentralization           | 0.09                       | 0.36  | 0.00                    | 0.98  |
| <b>Democratic Institutions</b>       |                            |       |                         |       |
| Liberal democracy                    | 0.27                       | 0.000 | 0.43                    | 0.002 |
| Free and fair subnational elections  | 0.24                       | 0.000 | 0.22                    | 0.02  |
| Media independence                   | 0.26                       | 0.000 | 0.39                    | 0.003 |

**Table A6** Estimates and p-values: Demographic Data Index

|                                      | <b>Without Control</b> |       | <b>With Control</b> |      |
|--------------------------------------|------------------------|-------|---------------------|------|
|                                      | Coefficient            | P     | Coefficient         | P    |
| <b>State capacity</b>                |                        |       |                     |      |
| Government effectiveness             | 0.21                   | 0.02  | −0.17               | 0.28 |
| Public health expenditures           | 0.30                   | 0.000 | 0.22                | 0.04 |
| Pandemic preparedness                | 0.15                   | 0.14  | 0.00                | 0.99 |
| Real-time surveillance and reporting | 0.18                   | 0.007 | 0.08                | 0.07 |
| Health capacity                      | 0.19                   | 0.05  | 0.06                | 0.58 |
| Laboratory systems                   | 0.16                   | 0.04  | 0.08                | 0.33 |
| <b>Decentralization</b>              |                        |       |                     |      |
| Fiscal decentralization              | 0.52                   | 0.000 | 0.20                | 0.12 |
| Administrative decentralization      | 0.29                   | 0.000 | 0.19                | 0.16 |
| Political decentralization           | 0.26                   | 0.000 | 0.15                | 0.06 |
| <b>Democratic Institutions</b>       |                        |       |                     |      |
| Liberal democracy                    | 0.27                   | 0.000 | 0.10                | 0.27 |
| Free and fair subnational elections  | 0.23                   | 0.004 | 0.11                | 0.14 |
| Media independence                   | 0.28                   | 0.000 | 0.15                | 0.06 |
